# Supplementary material
Source: PubMed Central journal article supplement (PMC4861209)

Hamilton et al. Figure S1

A

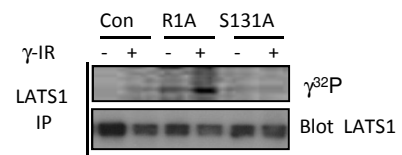

B

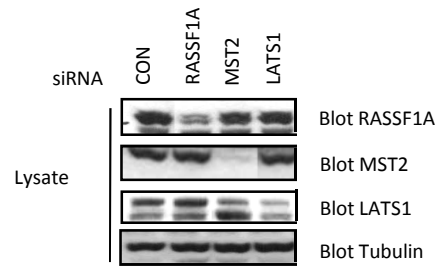

Hamilton et al. Figure S2

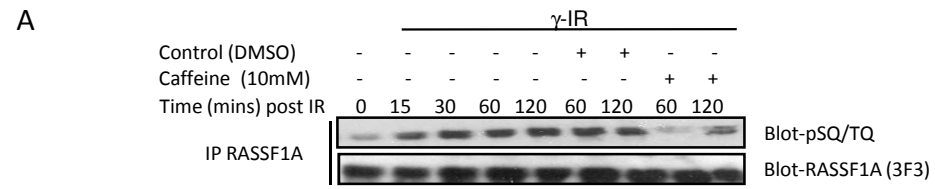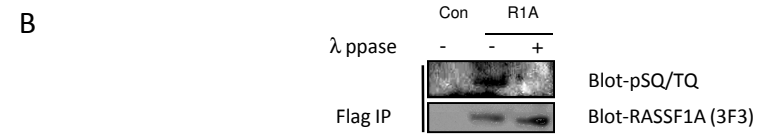

Hamilton et al. Figure S3

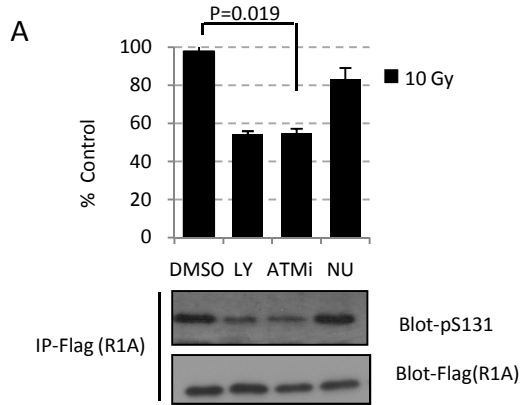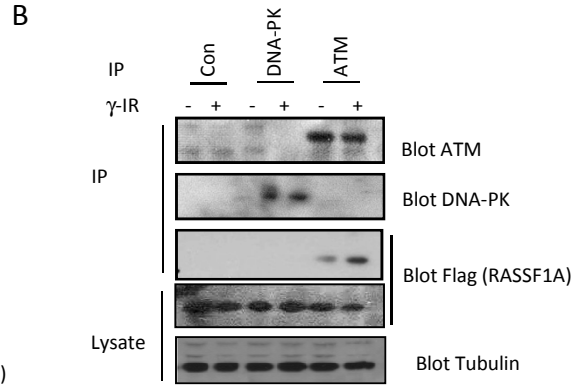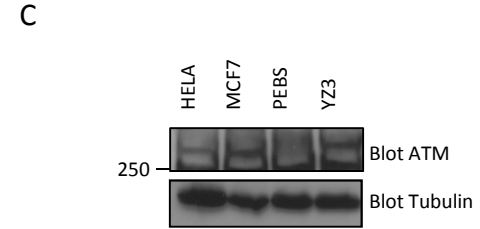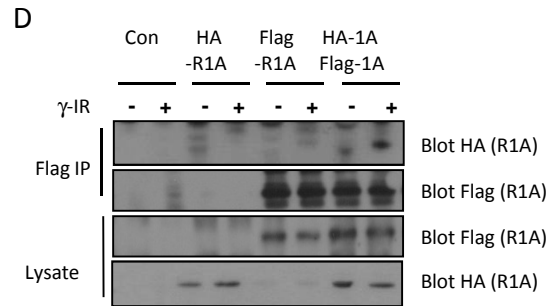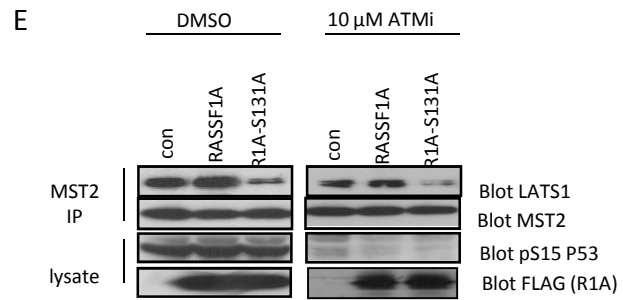

Hamilton et al. Figure S4

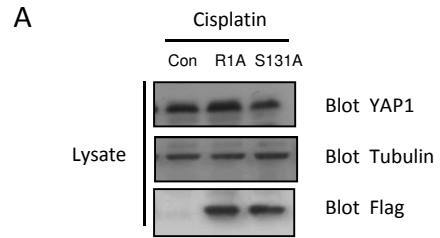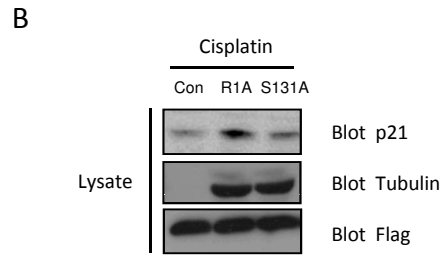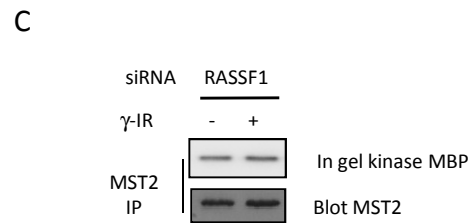

Supplement: NIHMS28698-supplement-2.pdf [file NIHMS28698-supplement-2.pdf]
